# Supplementary material
Source: HighWire-hosted journal article supplement (http://ajnr-stage2.highwire.org/highwire/filestream/103807/field_highwire_adjunct_files/0/0430.pdf)

### Supplemental Figure 1.

Sagittal T2WI (A) and Color DTI (B-C). There is severe deformity of the brainstem with posterior white matter protuberance (cap) at the mesencephalic pontine transition (arrowhead, A), corresponding to the transverse fibers of the pons displaced posteriorly (arrowheads B and C)

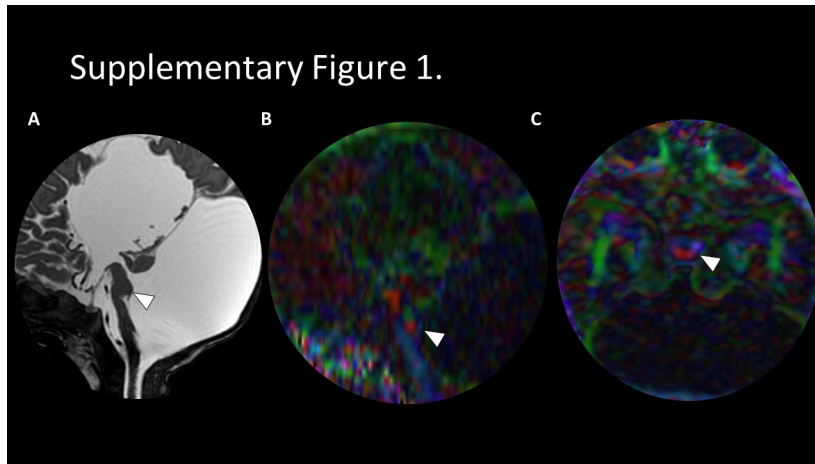

Supplement: 0430.pdf [file 0430.pdf]
